# Supplementary material for: Mapping the structure of perceptions in helping networks of Alaska Natives
Source: PubMed Central journal article supplement (PMC6231607; doi:10.1371/journal.pone.0204343), 2018-11-12
Supplement: pone.0204343.s001.pdf [file pone.0204343.s001.pdf]

**S1 Table.** Descriptive Statistics For the Northern Alaskan community network

| Variable                              | N   | Mean/% | Std. Dev. | Min | Max |
|---------------------------------------|-----|--------|-----------|-----|-----|
| Female                                | 167 | 41%    | 0.49      | 0   | 1   |
| Age                                   | 169 | 35.42  | 17.45     | 11  | 89  |
| Education                             |     |        |           |     |     |
| 8th or Less                           | 162 | 10%    | 0.31      | 0   | 1   |
| Some HS                               | 162 | 20%    | 0.4       | 0   | 1   |
| HS Complete                           | 162 | 57%    | 0.5       | 0   | 1   |
| Some College                          | 162 | 9%     | 0.29      | 0   | 1   |
| 2 Year Degree                         | 162 | 2%     | 0.14      | 0   | 1   |
| 4 Year Degree                         | 162 | 1%     | 0.08      | 0   | 1   |
| Graduate Work                         | 162 | 1%     | 0.08      | 0   | 1   |
| Weekly Household Income               |     |        |           |     |     |
| \$100                                 | 143 | 31%    | 0.47      | 0   | 1   |
| \$101-200                             | 143 | 13%    | 0.34      | 0   | 1   |
| \$201-400                             | 143 | 15%    | 0.36      | 0   | 1   |
| \$401-600                             | 143 | 6%     | 0.24      | 0   | 1   |
| \$601-1000                            | 143 | 13%    | 0.34      | 0   | 1   |
| \$1000+                               | 143 | 20%    | 0.4       | 0   | 1   |
| Weekly Individual Income              |     |        |           |     |     |
| \$100                                 | 127 | 42%    | 0.5       | 0   | 1   |
| \$101-200                             | 127 | 11%    | 0.31      | 0   | 1   |
| \$201-400                             | 127 | 13%    | 0.33      | 0   | 1   |
| \$401-600                             | 127 | 9%     | 0.28      | 0   | 1   |
| \$601-1000                            | 127 | 13%    | 0.34      | 0   | 1   |
| \$1000+                               | 127 | 13%    | 0.33      | 0   | 1   |
| Number of Children in Household       | 166 | 2.42   | 2.03      | 0   | 9   |
| Number of Adults in household         | 168 | 2.92   | 1.5       | 0   | 7   |
| Ratio of People to Bedrooms           | 160 | 1.99   | 1.33      | 0   | 12  |
| Subsistence Access Scale <sup>a</sup> | 162 | 2.51   | 2.04      | 0   | 6   |

<sup>a</sup> - Local Measure for Socioeconomic Status
