# Supplementary material for: Mapping the structure of perceptions in helping networks of Alaska Natives
Source: PubMed Central journal article supplement (PMC6231607; doi:10.1371/journal.pone.0204343), 2018-11-12
Supplement: pone.0204343.s002.pdf [file pone.0204343.s002.pdf]

**S2 Table.** Multinomial Results: Makes positive changes in the community

|                      | <i>Dependent variable:</i>                           |                      |
|----------------------|------------------------------------------------------|----------------------|
|                      | Makes positive changes in the community <sup>a</sup> |                      |
|                      | (-1)                                                 | (1)                  |
| Class 1 <sup>b</sup> | -8.542<br>(98.995)                                   | -0.106<br>(0.588)    |
| Class 2 <sup>b</sup> | -7.007<br>(47.379)                                   | 0.871*<br>(0.445)    |
| Class 4 <sup>b</sup> | 0.048<br>(1.234)                                     | -0.147<br>(0.475)    |
| Class 5 <sup>b</sup> | 0.511<br>(1.238)                                     | -0.243<br>(0.585)    |
| Class 6 <sup>b</sup> | 1.313<br>(1.018)                                     | -0.135<br>(0.587)    |
| Constant             | -4.175***<br>(0.713)                                 | -2.034***<br>(0.258) |
| Akaike Inf. Crit.    | 355.913                                              | 355.913              |

\*  $p < 0.1$ ; \*\*  $p < 0.05$ ; \*\*\*  $p < 0.01$

<sup>a</sup> - Reference category - "0"s

<sup>b</sup> - Reference category - Class 3
