# Supplementary material for: Mapping the structure of perceptions in helping networks of Alaska Natives
Source: PubMed Central journal article supplement (PMC6231607; doi:10.1371/journal.pone.0204343), 2018-11-12
Supplement: pone.0204343.s003.pdf [file pone.0204343.s003.pdf]

**S3 Table.** Multinomial Results: Helps young people in general

|                      | <i>Dependent variable:</i>                 |                      |
|----------------------|--------------------------------------------|----------------------|
|                      | Helps young people in general <sup>a</sup> |                      |
|                      | (-1)                                       | (1)                  |
| Class 1 <sup>b</sup> | -6.036<br>(40.054)                         | -0.198<br>(0.664)    |
| Class 2 <sup>b</sup> | 1.316<br>(1.427)                           | 0.285<br>(0.554)     |
| Class 4 <sup>b</sup> | 0.741<br>(1.423)                           | -0.290<br>(0.543)    |
| Class 5 <sup>b</sup> | 1.289<br>(1.427)                           | 0.440<br>(0.522)     |
| Class 6 <sup>b</sup> | 1.344<br>(1.428)                           | 0.313<br>(0.555)     |
| Constant             | -4.900***<br>(1.005)                       | -2.259***<br>(0.281) |
| Akaike Inf. Crit.    | 319.711                                    | 319.711              |

\* $p < 0.1$ ; \*\* $p < 0.05$ ; \*\*\* $p < 0.01$

<sup>a</sup> - Reference category - "0"s

<sup>b</sup> - Reference category - Class 3
