# Supplementary material for: Mapping the structure of perceptions in helping networks of Alaska Natives
Source: PubMed Central journal article supplement (PMC6231607; doi:10.1371/journal.pone.0204343), 2018-11-12
Supplement: pone.0204343.s004.pdf [file pone.0204343.s004.pdf]

**S4 Table.** Multinomial Results: Helps people with alcohol problems

|                      | <i>Dependent variable:</i>                      |                      |
|----------------------|-------------------------------------------------|----------------------|
|                      | Helps people with alcohol problems <sup>a</sup> |                      |
|                      | (-1)                                            | (1)                  |
| Class 1 <sup>b</sup> | 0.700<br>(0.886)                                | 0.006<br>(1.134)     |
| Class 2 <sup>b</sup> | 1.050<br>(0.786)                                | 0.644<br>(0.885)     |
| Class 4 <sup>b</sup> | 0.065<br>(0.879)                                | 0.065<br>(0.879)     |
| Class 5 <sup>b</sup> | 0.518<br>(0.883)                                | -10.160<br>(147.243) |
| Class 6 <sup>b</sup> | 0.644<br>(0.885)                                | 0.644<br>(0.885)     |
| Constant             | -3.562***<br>(0.507)                            | -3.562***<br>(0.507) |
| Akaike Inf. Crit.    | 243.888                                         | 243.888              |

\* $p < 0.1$ ; \*\* $p < 0.05$ ; \*\*\* $p < 0.01$

<sup>a</sup> - Reference category - "0"s

<sup>b</sup> - Reference category - Class 3
