# Supplementary material for: Mapping the structure of perceptions in helping networks of Alaska Natives
Source: PubMed Central journal article supplement (PMC6231607; doi:10.1371/journal.pone.0204343), 2018-11-12
Supplement: pone.0204343.s005.pdf [file pone.0204343.s005.pdf]

**S5 Table.** Multinomial Results: Helps women who are having trouble at home

|                      | <i>Dependent variable:</i>                              |                        |
|----------------------|---------------------------------------------------------|------------------------|
|                      | Helps women who are having trouble at home <sup>a</sup> |                        |
|                      | (-1)                                                    | (1)                    |
| Class 1 <sup>b</sup> | -0.609<br>(1.085)                                       | -0.273<br>(1.111)      |
| Class 2 <sup>b</sup> | 0.777<br>(0.654)                                        | 0.420<br>(0.857)       |
| Class 4 <sup>b</sup> | -0.552<br>(0.815)                                       | -15.156<br>(1,240.691) |
| Class 5 <sup>b</sup> | 0.359<br>(0.713)                                        | -33.799***<br>(0.000)  |
| Class 6 <sup>b</sup> | -0.663<br>(1.085)                                       | 0.366<br>(0.857)       |
| Constant             | -2.974***<br>(0.388)                                    | -3.311***<br>(0.455)   |
| Akaike Inf. Crit.    | 249.647                                                 | 249.647                |

\*  $p < 0.1$ ; \*\*  $p < 0.05$ ; \*\*\*  $p < 0.01$

<sup>a</sup> - Reference category - "0"s

<sup>b</sup> - Reference category - Class 3
