# Supplementary material for: Mapping the structure of perceptions in helping networks of Alaska Natives
Source: PubMed Central journal article supplement (PMC6231607; doi:10.1371/journal.pone.0204343), 2018-11-12
Supplement: pone.0204343.s006.pdf [file pone.0204343.s006.pdf]

**S6 Table.** Multinomial Results: Helps men who are having trouble at home

|                      | <i>Dependent variable:</i>                            |                         |
|----------------------|-------------------------------------------------------|-------------------------|
|                      | Helps men who are having trouble at home <sup>a</sup> |                         |
|                      | (-1)                                                  | (1)                     |
| Class 1 <sup>b</sup> | -19.740***<br>(0.00000)                               | -17.726***<br>(0.00001) |
| Class 2 <sup>b</sup> | 0.064<br>(0.823)                                      | 1.029<br>(0.786)        |
| Class 4 <sup>b</sup> | -0.125<br>(0.706)                                     | -14.984<br>(1,287.220)  |
| Class 5 <sup>b</sup> | 0.391<br>(0.713)                                      | -0.148<br>(1.132)       |
| Class 6 <sup>b</sup> | -17.594***<br>(0.00000)                               | 0.571<br>(0.885)        |
| Constant             | -2.981***<br>(0.387)                                  | -3.541***<br>(0.507)    |
| Akaike Inf. Crit.    | 226.371                                               | 226.371                 |

\*  $p < 0.1$ ; \*\*  $p < 0.05$ ; \*\*\*  $p < 0.01$

<sup>a</sup> - Reference category - "0"s

<sup>b</sup> - Reference category - Class 3
