# Supplementary material for: Mapping the structure of perceptions in helping networks of Alaska Natives
Source: PubMed Central journal article supplement (PMC6231607; doi:10.1371/journal.pone.0204343), 2018-11-12
Supplement: pone.0204343.s007.pdf [file pone.0204343.s007.pdf]

**S7 Table.** Multinomial Results: Helps elders who are having trouble at home

|                      | <i>Dependent variable:</i>                               |                      |
|----------------------|----------------------------------------------------------|----------------------|
|                      | Helps elders who are having trouble at home <sup>a</sup> |                      |
|                      | (-1)                                                     | (1)                  |
| Class 1 <sup>b</sup> | -10.413<br>(370.641)                                     | 0.436<br>(0.518)     |
| Class 2 <sup>b</sup> | 1.299<br>(1.427)                                         | 0.136<br>(0.546)     |
| Class 4 <sup>b</sup> | -82.319                                                  | -0.257<br>(0.502)    |
| Class 5 <sup>b</sup> | -12.151<br>(780.589)                                     | -0.505<br>(0.654)    |
| Class 6 <sup>b</sup> | -11.732<br>(695.333)                                     | 0.530<br>(0.492)     |
| Constant             | -4.883***<br>(1.004)                                     | -2.110***<br>(0.265) |
| Akaike Inf. Crit.    | 310.731                                                  | 310.731              |

\* $p < 0.1$ ; \*\* $p < 0.05$ ; \*\*\* $p < 0.01$

<sup>a</sup> - Reference category - "0"s

<sup>b</sup> - Reference category - Class 3
