# Supplementary material for: Mapping the structure of perceptions in helping networks of Alaska Natives
Source: PubMed Central journal article supplement (PMC6231607; doi:10.1371/journal.pone.0204343), 2018-11-12
Supplement: pone.0204343.s008.pdf [file pone.0204343.s008.pdf]

**S8 Table.** Multinomial Results: Helps young people who are having trouble at home

|                      | <i>Dependent variable:</i>                                     |                      |
|----------------------|----------------------------------------------------------------|----------------------|
|                      | Helps young people who are having trouble at home <sup>a</sup> |                      |
|                      | (-1)                                                           | (1)                  |
| Class 1 <sup>b</sup> | -10.069<br>(178.046)                                           | 0.583<br>(0.631)     |
| Class 2 <sup>b</sup> | 0.265<br>(1.170)                                               | 0.959*<br>(0.560)    |
| Class 4 <sup>b</sup> | -0.368<br>(1.164)                                              | -0.368<br>(0.683)    |
| Class 5 <sup>b</sup> | 0.107<br>(1.168)                                               | -0.298<br>(0.802)    |
| Class 6 <sup>b</sup> | -9.075<br>(103.822)                                            | 0.498<br>(0.629)     |
| Constant             | -3.821***<br>(0.584)                                           | -2.723***<br>(0.344) |
| Akaike Inf. Crit.    | 277.223                                                        | 277.223              |

\*  $p < 0.1$ ; \*\*  $p < 0.05$ ; \*\*\*  $p < 0.01$

<sup>a</sup> - Reference category - "0"s

<sup>b</sup> - Reference category - Class 3
