# Supplementary material for: Mapping the structure of perceptions in helping networks of Alaska Natives
Source: PubMed Central journal article supplement (PMC6231607; doi:10.1371/journal.pone.0204343), 2018-11-12
Supplement: pone.0204343.s009.pdf [file pone.0204343.s009.pdf]

**S9 Table.** Multinomial Results: Helps people learn about traditional knowledge

|                      | <i>Dependent variable:</i>                                  |                      |
|----------------------|-------------------------------------------------------------|----------------------|
|                      | Helps people learn about traditional knowledge <sup>a</sup> |                      |
|                      | (-1)                                                        | (1)                  |
| Class 1 <sup>b</sup> | -11.592<br>(428.801)                                        | -11.203<br>(117.623) |
| Class 2 <sup>b</sup> | 0.767<br>(1.241)                                            | 0.967**<br>(0.433)   |
| Class 4 <sup>b</sup> | 0.089<br>(1.235)                                            | 0.195<br>(0.425)     |
| Class 5 <sup>b</sup> | -8.934<br>(109.284)                                         | -0.645<br>(0.649)    |
| Class 6 <sup>b</sup> | 0.531<br>(1.238)                                            | -0.975<br>(0.768)    |
| Constant             | -4.168***<br>(0.713)                                        | -1.969***<br>(0.252) |
| Alaike Inf. Crit.    | 326.434                                                     | 326.434              |

\*  $p < 0.1$ ; \*\*  $p < 0.05$ ; \*\*\*  $p < 0.01$

<sup>a</sup> - Reference category - "0"s

<sup>b</sup> - Reference category - Class 3
