# Supplementary material for: Mapping the structure of perceptions in helping networks of Alaska Natives
Source: PubMed Central journal article supplement (PMC6231607; doi:10.1371/journal.pone.0204343), 2018-11-12
Supplement: pone.0204343.s010.pdf [file pone.0204343.s010.pdf]

**S10 Table.** Multinomial Results: Gives money food or other needed things to people who need them

|                      | <i>Dependent variable:</i>                                                   |                      |
|----------------------|------------------------------------------------------------------------------|----------------------|
|                      | Gives money food or other needed things to people who need them <sup>a</sup> |                      |
|                      | (-1)                                                                         | (1)                  |
| Class 1 <sup>b</sup> | -7.001<br>(46.001)                                                           | -0.037<br>(0.591)    |
| Class 2 <sup>b</sup> | 1.509<br>(1.021)                                                             | 1.133**<br>(0.442)   |
| Class 4 <sup>b</sup> | 0.748<br>(1.012)                                                             | -0.232<br>(0.503)    |
| Class 5 <sup>b</sup> | 0.599<br>(1.239)                                                             | 0.465<br>(0.491)     |
| Class 6 <sup>b</sup> | 0.781<br>(1.241)                                                             | 1.004**<br>(0.451)   |
| Constant             | -4.182***<br>(0.712)                                                         | -2.103***<br>(0.265) |
| Akaike Inf. Crit.    | 395.981                                                                      | 395.981              |

\* $p < 0.1$ ; \*\* $p < 0.05$ ; \*\*\* $p < 0.01$

<sup>a</sup> - Reference category - "0"s

<sup>b</sup> - Reference category - Class 3
