# Supplementary material for: Mapping the structure of perceptions in helping networks of Alaska Natives
Source: PubMed Central journal article supplement (PMC6231607; doi:10.1371/journal.pone.0204343), 2018-11-12
Supplement: pone.0204343.s011.pdf [file pone.0204343.s011.pdf]

**S11 Table.** Multinomial Results: Will correct a young person if he or she is doing something wrong

|                      | <i>Dependent variable:</i>                                                     |                      |
|----------------------|--------------------------------------------------------------------------------|----------------------|
|                      | Will correct a young person if he or she is doing something wrong <sup>a</sup> |                      |
|                      | (-1)                                                                           | (1)                  |
| Class 1 <sup>b</sup> | -6.542<br>(52.738)                                                             | 0.119<br>(0.431)     |
| Class 2 <sup>b</sup> | -5.789<br>(36.827)                                                             | 0.595<br>(0.383)     |
| Class 4 <sup>b</sup> | 0.731<br>(1.424)                                                               | -0.173<br>(0.367)    |
| Class 5 <sup>b</sup> | -6.193<br>(40.313)                                                             | -0.071<br>(0.424)    |
| Class 6 <sup>b</sup> | 1.321<br>(1.429)                                                               | 0.051<br>(0.428)     |
| Constant             | -4.755***<br>(1.005)                                                           | -1.288***<br>(0.200) |
| Akaike Inf. Crit.    | 459.511                                                                        | 459.511              |

\* $p < 0.1$ ; \*\* $p < 0.05$ ; \*\*\* $p < 0.01$

<sup>a</sup> - Reference category - "0"s

<sup>b</sup> - Reference category - Class 3
