# Supplementary material for: Mapping the structure of perceptions in helping networks of Alaska Natives
Source: PubMed Central journal article supplement (PMC6231607; doi:10.1371/journal.pone.0204343), 2018-11-12
Supplement: pone.0204343.s012.pdf [file pone.0204343.s012.pdf]

**S12 Table.** Multinomial Results: Is a member of a respected family

| <i>Dependent variable:</i>                     |                       |                      |
|------------------------------------------------|-----------------------|----------------------|
| Is a member of a respected family <sup>a</sup> |                       |                      |
|                                                | (-1)                  | (1)                  |
| Class 1 <sup>b</sup>                           | -4.574***<br>(0.000)  | 0.152<br>(0.385)     |
| Class 2 <sup>b</sup>                           | -5.055***<br>(0.000)  | 0.321<br>(0.364)     |
| Class 4 <sup>b</sup>                           | -8.425***<br>(0.000)  | -0.331<br>(0.330)    |
| Class 5 <sup>b</sup>                           | -5.296***<br>(0.000)  | -0.175<br>(0.382)    |
| Class 6 <sup>b</sup>                           | 18.958***<br>(0.509)  | -0.163<br>(0.396)    |
| Constant                                       | -22.325***<br>(0.509) | -0.806***<br>(0.177) |
| Akaike Inf. Crit.                              | 498.460               | 498.460              |

\* $p < 0.1$ ; \*\* $p < 0.05$ ; \*\*\* $p < 0.01$

<sup>a</sup> - Reference category - "0"s

<sup>b</sup> - Reference category - Class 3
