# Supplementary material for: Mapping the structure of perceptions in helping networks of Alaska Natives
Source: PubMed Central journal article supplement (PMC6231607; doi:10.1371/journal.pone.0204343), 2018-11-12
Supplement: pone.0204343.s013.pdf [file pone.0204343.s013.pdf]

**S13 Table.** Multinomial Results: Act in ways that are good for the community

|                      | <i>Dependent variable:</i>                               |                      |
|----------------------|----------------------------------------------------------|----------------------|
|                      | Act in ways that are good for the community <sup>a</sup> |                      |
|                      | (-1)                                                     | (1)                  |
| Class 1 <sup>b</sup> | 5.883***<br>(0.00003)                                    | 0.037<br>(0.401)     |
| Class 2 <sup>b</sup> | 23.893***<br>(5.348)                                     | 0.489<br>(0.368)     |
| Class 4 <sup>b</sup> | 17.075<br>(15.871)                                       | -0.053<br>(0.325)    |
| Class 5 <sup>b</sup> | 8.746***<br>(0.001)                                      | 0.066<br>(0.377)     |
| Class 6 <sup>b</sup> | 24.339***<br>(5.324)                                     | -0.585<br>(0.455)    |
| Constant             | -27.111***<br>(5.299)                                    | -0.935***<br>(0.182) |
| Akaike Inf. Crit.    | 499.214                                                  | 499.214              |

\* $p < 0.1$ ; \*\* $p < 0.05$ ; \*\*\* $p < 0.01$

<sup>a</sup> - Reference category - "0"s

<sup>b</sup> - Reference category - Class 3
