# Supplementary material for: Mapping the structure of perceptions in helping networks of Alaska Natives
Source: PubMed Central journal article supplement (PMC6231607; doi:10.1371/journal.pone.0204343), 2018-11-12
Supplement: pone.0204343.s014.pdf [file pone.0204343.s014.pdf]

**S14 Table.** Multinomial Results: Gives good advice most of the time

|                      | <i>Dependent variable:</i>                      |                      |
|----------------------|-------------------------------------------------|----------------------|
|                      | Gives good advice most of the time <sup>a</sup> |                      |
|                      | (-1)                                            | (1)                  |
| Class 1 <sup>b</sup> | -9.761<br>(261.318)                             | 0.071<br>(0.501)     |
| Class 2 <sup>b</sup> | 2.064*<br>(1.241)                               | 0.359<br>(0.458)     |
| Class 4 <sup>b</sup> | -56.242                                         | -0.622<br>(0.485)    |
| Class 5 <sup>b</sup> | 1.892<br>(1.239)                                | -0.506<br>(0.574)    |
| Class 6 <sup>b</sup> | -10.618<br>(383.588)                            | -0.018<br>(0.499)    |
| Constant             | -4.836***<br>(1.004)                            | -1.745***<br>(0.231) |
| Akaike Inf. Crit.    | 367.467                                         | 367.467              |

\* $p < 0.1$ ; \*\* $p < 0.05$ ; \*\*\* $p < 0.01$

<sup>a</sup> - Reference category - "0"s

<sup>b</sup> - Reference category - Class 3
