# Supplementary material for: Mapping the structure of perceptions in helping networks of Alaska Natives
Source: PubMed Central journal article supplement (PMC6231607; doi:10.1371/journal.pone.0204343), 2018-11-12
Supplement: pone.0204343.s015.pdf [file pone.0204343.s015.pdf]

**S15 Table.** Multinomial Results: Are a positive influence on others in this community

|                      | <i>Dependent variable:</i>                                        |                      |
|----------------------|-------------------------------------------------------------------|----------------------|
|                      | Are a positive influence on others in this community <sup>a</sup> |                      |
|                      | (-1)                                                              | (1)                  |
| Class 1 <sup>b</sup> | -11.639<br>(459.336)                                              | -0.227<br>(0.492)    |
| Class 2 <sup>b</sup> | -10.106<br>(213.373)                                              | 0.284<br>(0.419)     |
| Class 4 <sup>b</sup> | -13.647<br>(907.763)                                              | -0.467<br>(0.414)    |
| Class 5 <sup>b</sup> | 0.531<br>(1.240)                                                  | -0.029<br>(0.445)    |
| Class 6 <sup>b</sup> | 0.589<br>(1.240)                                                  | -0.104<br>(0.466)    |
| Constant             | -4.086***<br>(0.713)                                              | -1.447***<br>(0.210) |
| Akaike Inf. Crit.    | 418.699                                                           | 418.699              |

\*  $p < 0.1$ ; \*\*  $p < 0.05$ ; \*\*\*  $p < 0.01$

<sup>a</sup> - Reference category - "0"s

<sup>b</sup> - Reference category - Class 3
