# Supplementary material for: Mapping the structure of perceptions in helping networks of Alaska Natives
Source: PubMed Central journal article supplement (PMC6231607; doi:10.1371/journal.pone.0204343), 2018-11-12
Supplement: pone.0204343.s016.pdf [file pone.0204343.s016.pdf]

**S16 Table.** Multinomial Results: Are willing to help out people who are in need

|                      | <i>Dependent variable:</i>                                  |                      |
|----------------------|-------------------------------------------------------------|----------------------|
|                      | Are willing to help out people who are in need <sup>a</sup> |                      |
|                      | (-1)                                                        | (1)                  |
| Class 1 <sup>b</sup> | 1.859<br>(2.349)                                            | -0.333<br>(0.421)    |
| Class 2 <sup>b</sup> | 5.609<br>(329.110)                                          | 0.452<br>(0.361)     |
| Class 4 <sup>b</sup> | 9.458<br>(118.575)                                          | -0.379<br>(0.336)    |
| Class 5 <sup>b</sup> | 2.941<br>(8.829)                                            | -0.520<br>(0.414)    |
| Class 6 <sup>b</sup> | 17.527<br>(114.309)                                         | -0.713<br>(0.453)    |
| Constant             | -21.024<br>(114.307)                                        | -0.838***<br>(0.178) |
| Akaike Inf. Crit.    | 471.180                                                     | 471.180              |

\*  $p < 0.1$ ; \*\*  $p < 0.05$ ; \*\*\*  $p < 0.01$

<sup>a</sup> - Reference category - "0"s

<sup>b</sup> - Reference category - Class 3
