# Supplementary material for: Mapping the structure of perceptions in helping networks of Alaska Natives
Source: PubMed Central journal article supplement (PMC6231607; doi:10.1371/journal.pone.0204343), 2018-11-12
Supplement: pone.0204343.s017.pdf [file pone.0204343.s017.pdf]

**S17 Table.** Multinomial Results: Helps people who tend to be left out

| <i>Dependent variable:</i>                        |                      |
|---------------------------------------------------|----------------------|
| Helps people who tend to be left out <sup>a</sup> |                      |
| Class 1 <sup>b</sup>                              | 0.507<br>(0.366)     |
| Class 2 <sup>b</sup>                              | 0.412<br>(0.352)     |
| Class 4 <sup>b</sup>                              | -0.081<br>(0.301)    |
| Class 5 <sup>b</sup>                              | -0.152<br>(0.360)    |
| Class 6 <sup>b</sup>                              | -0.496<br>(0.391)    |
| Constant                                          | -0.507***<br>(0.169) |
|                                                   |                      |
| Akaike Inf. Crit.                                 | 515.479              |

\* $p < 0.1$ ; \*\* $p < 0.05$ ; \*\*\* $p < 0.01$

<sup>a</sup> - Reference category - "0"s

<sup>b</sup> - Reference category - Class 3
